# 1 The Genomic History of Southeastern Europe

---

2 Iain Mathieson<sup>+</sup> (1), Songül Alpaslan Roodenberg (1), Cosimo Posth (2,3), Anna Szécsényi-  
3 Nagy (4), Nadin Rohland (1), Swapan Mallick (1,5), Iñigo Olalde (1), Nasreen  
4 Broomandkoshbacht (1,5), Olivia Cheronet (6), Daniel Fernandes (6,7), Matthew Ferry  
5 (1,5), Beatriz Gamarra (6), Gloria González Fortes (8), Wolfgang Haak (2,9), Eadaoin Harney  
6 (1,5), Ben Krause-Kyora (2), Isil Kucukkalipci (3), Megan Michel (1,5), Alissa Mittnik (3),  
7 Kathrin Nägele (2), Mario Novak (6,10), Jonas Oppenheimer (1,5), Nick Patterson (11),  
8 Saskia Pfrenkle (3), Kendra Sirak (6,12), Kristin Stewardson (1,5), Stefania Vai (13), Stefan  
9 Alexandrov (14), Kurt W. Alt (15,16,17), Radian Andreescu (18), Dragana Antonović (19),  
10 Abigail Ash (6), Nadezhda Atanassova (20), Krum Bacvarov (14), Mende Balázs Gusztáv  
11 (4), Hervé Bocherens (21,22), Michael Bolus (23), Adina Boroneanț (24), Yavor Boyadzhiev  
12 (14), Alicja Budnik (25), Josip Burmaz (26), Ștefan Chohadzhiev (27), Nicholas J. Conard  
13 (28,22), Richard Cottiaux (29), Maja Čuka (30), Christophe Cupillard (31,32), Dorothée G.  
14 Drucker (22), Nedko Elenski (33), Michael Francken (34), Borislava Galabova (35), Georgi  
15 Ganetovski (36), Bernard Gely (37), Tamás Hajdu (38), Veneta Handzhyska (39), Katerina  
16 Harvati (34,22), Thomas Higham (40), Stanislav Iliev (41), Ivor Janković (10,42), Ivor  
17 Karavanić (43,42), Douglas J. Kennett (44), Darko Komšo (30), Alexandra Kozak (45),  
18 Damian Labuda (46), Martina Lari (13), Catalin Lazar (47,48), Maleen Leppek (49),  
19 Krassimir Leshtakov (39), Domenico Lo Vetro (50,51), Dženi Los (26), Ivaylo Lozanov (39),  
20 Maria Malina (23), Fabio Martini (50,51), Kath McSweeney (52), Harald Meller (17), Marko  
21 Menđušić (53), Pavel Mirea (54), Vyacheslav Moiseyev (55), Vanya Petrova (39), T. Douglas  
22 Price (56), Angela Simalcsik (57), Luca Sineo (58), Mario Šlaus (59), Vladimir Slavchev  
23 (60), Petar Stanev (33), Andrej Starović (61), Tamás Szeniczey (38), Sahnra Talamo (62),  
24 Maria Teschler-Nicola (63), Corinne Thevenet (64), Ivan Valchev (39), Frédérique Valentin  
25 (65), Sergey Vasilyev (66), Fanica Veljanovska (67), Svetlana Venelinova (68), Elizaveta  
26 Veselovskaya (66), Bence Viola (69,70), Cristian Virag (71), Joško Zaninović (72), Steve  
27 Zäuner (73), Philipp W. Stockhammer (49,2), Giulio Catalano (58), Raiko Krauß (74), David  
28 Caramelli (13), Gunita Zariņa (75), Bisserka Gaydarska (76), Malcolm Lillie (77), Alexey G.  
29 Nikitin (78), Inna Potekhina (45), Anastasia Papatthasiou (79), Dušan Borić (80), Clive  
30 Bonsall (52), Johannes Krause (2,3), Ron Pinhasi\*<sup>+</sup> (6,81), David Reich\*<sup>+</sup> (1,11,5)

31  
32 \* These authors contributed equally to the manuscript

33 <sup>+</sup> Correspondence to I.M. ([iain\\_mathieson@hms.harvard.edu](mailto:iain_mathieson@hms.harvard.edu)) or D.R.

34 ([reich@genetics.med.harvard.edu](mailto:reich@genetics.med.harvard.edu)) or R.P. ([ron.pinhasi@ucd.ie](mailto:ron.pinhasi@ucd.ie))

35  
36 (1) Department of Genetics, Harvard Medical School, Boston 02115 MA USA (2) Department of Archaeogenetics,  
37 Max Planck Institute for the Science of Human History, 07745 Jena, Germany (3) Institute for Scientific  
38 Archaeology, University of Tuebingen, Germany (4) Laboratory of Archaeogenetics, Institute of Archaeology,  
39 Research Centre for the Humanities, Hungarian Academy of Sciences, H-1097 Budapest, Hungary (5) Howard  
40 Hughes Medical Institute, Harvard Medical School, Boston 02115 MA USA (6) School of Archaeology and Earth  
41 Institute, University College Dublin, Belfield, Dublin 4, Republic of Ireland (7) CIAS, Department of Life  
42 Sciences, University of Coimbra, 3000-456 Coimbra, Portugal (8) Department of Life Sciences and  
43 Biotechnology, University of Ferrara, Via L.Borsari 46. Ferrara 44100 Italy (9) Australian Centre for Ancient  
44 DNA, School of Biological Sciences, The University of Adelaide, SA-5005 Adelaide, Australia (10) Institute for  
45 Anthropological Research, Ljudevita Gaja 32, 10000 Zagreb, Croatia (11) Broad Institute of Harvard and MIT,  
46 Cambridge MA (12) Department of Anthropology, Emory University, Atlanta, Georgia 30322, USA (13)  
47 Dipartimento di Biologia, Università di Firenze, 50122 Florence, Italy (14) National Institute of Archaeology and  
48 Museum, Bulgarian Academy of Sciences, 2 Saborna Str., BG-1000 Sofia, Bulgaria (15) Danube Private  
49 University, A-3500 Krems, Austria (16) Department of Biomedical Engineering and Integrative Prehistory and  
50 Archaeological Science, CH-4123 Basel-Allschwil, Switzerland (17) State Office for Heritage Management and  
51 Archaeology Saxony-Anhalt and State Museum of Prehistory, D-06114 Halle, Germany (18) Romanian National  
52 History Museum, Bucharest, Romania (19) Institute of Archaeology, Belgrade, Serbia (20) Institute of  
53 Experimental Morphology, Pathology and Anthropology with Museum, Bulgarian Academy of Sciences, Sofia,  
54 Bulgaria (21) Department of Geosciences, Biogeology, Universität Tübingen, Hölderlinstr. 12, 72074 Tübingen,  
55 Germany (22) Senckenberg Centre for Human Evolution and Palaeoenvironment, University of Tuebingen, 72072

56 Tuebingen, Germany (23) Heidelberg Academy of Sciences and Humanities, Research Center “The Role of  
57 Culture in Early Expansions of Humans” at the University of Tuebingen, Rümelinstraße 23, 72070 Tuebingen,  
58 Germany (24) ‘Vasile Pârvan’ Institute of Archaeology, Romanian Academy (25) Human Biology Department,  
59 Cardinal Stefan Wyszyński University, Warsaw, Poland (26) KADUCEJ d.o.o Papandopulova 27, 21000 Split,  
60 Croatia (27) St. Cyril and Methodius University, Veliko Turnovo, Bulgaria (28) Department of Early Prehistory  
61 and Quaternary Ecology, University of Tuebingen, Schloss HohenTuebingen, 72070 Tuebingen, Germany (29)  
62 INRAP/UMR 8215 Trajectoires, 21 Allée de l’Université, 92023 Nanterre, France (30) Archaeological Museum of  
63 Istria, Carrarina 3, 52100 Pula, Croatia (31) Service Régional de l’Archéologie de Bourgogne-Franche-Comté, 7  
64 rue Charles Nodier, 25043 Besançon Cedex, France (32) Laboratoire Chronoenvironnement, UMR 6249 du  
65 CNRS, UFR des Sciences et Techniques, 16 route de Gray, 25030 Besançon Cedex, France (33) Regional  
66 Museum of History Veliko Tarnovo, Veliko Tarnovo, Bulgaria (34) Institute for Archaeological Sciences,  
67 Paleoanthropology, University of Tuebingen, Rümelinstraße 23, 72070 Tuebingen, Germany (35) Laboratory for  
68 human bio-archaeology, Bulgaria, 1202 Sofia, 42, George Washington str (36) Regional Museum of History,  
69 Vratsa, Bulgaria (37) Service Régional de l’Archéologie d’Auvergne-Rhône-Alpes, Le Grenier d’Abondance, 6  
70 quai Saint-Vincent, 69283 Lyon Cedex 01, France (38) Eötvös Loránd University, Faculty of Science, Institute of  
71 Biology, Department of Biological Anthropology, H-1117 Pázmány Péter sétány 1/c. Budapest, Hungary (39)  
72 Department of Archaeology, Sofia University St. Kliment Ohridski, Bulgaria (40) Oxford Radiocarbon  
73 Accelerator Unit, Research Laboratory for Archaeology and the History of Art, University of Oxford, Dyson  
74 Perrins Building, South Parks Road, OX1 3QY Oxford, UK (41) Regional Museum of History, Haskovo, Bulgaria  
75 (42) Department of Anthropology, University of Wyoming, 1000 E. University Avenue, Laramie, WY 82071,  
76 USA (43) Department of Archaeology, Faculty of Humanities and Social Sciences, University of Zagreb, Ivana  
77 Lučića 3, 10000 Zagreb, Croatia (44) Department of Anthropology and Institutes for Energy and the Environment,  
78 Pennsylvania State University, University Park, PA 16802 (45) Department of Bioarchaeology, Institute of  
79 Archaeology, National Academy of Sciences of Ukraine (46) CHU Sainte-Justine Research Center, Pediatric  
80 Department, Université de Montréal, Montreal, PQ, Canada, H3T 1C5 (47) National History Museum of Romania,  
81 Calea Victoriei, no. 12, 030026, Bucharest, Romania (48) University of Bucharest, Mihail Kogalniceanu 36-46,  
82 50107, Bucharest, Romania (49) Institute for Pre- and Protohistoric Archaeology and the Archaeology of the  
83 Roman Provinces, Ludwig-Maximilians-University, Schellingstr. 12, 80799 Munich, Germany (50) Dipartimento  
84 SAGAS - Sezione di Archeologia e Antico Oriente, Università degli Studi di Firenze, 50122 Florence, Italy (51)  
85 Museo e Istituto fiorentino di Preistoria, 50122 Florence, Italy (52) School of History, Classics and Archaeology,  
86 University of Edinburgh, Edinburgh EH8 9AG, United Kingdom (53) Conservation Department in Šibenik,  
87 Ministry of Culture of the Republic of Croatia, Jurja Čulinovića 1, 22000 Šibenik, Croatia (54) Teleorman County  
88 Museum, str. 1848, no. 1, 140033 Alexandria, Romania (55) Peter the Great Museum of Anthropology and  
89 Ethnography (Kunstkamera) RAS, 199034 St. Petersburg, Russia (56) University of Wisconsin, Madison WI, USA  
90 (57) Olga Necrasov Centre for Anthropological Research, Romanian Academy – Iași Branch, Theodor Codrescu  
91 St. 2, P.C. 700481, Iași, Romania (58) Dipartimento di Scienze e tecnologie biologiche, chimiche e farmaceutiche,  
92 Lab. of Anthropology, Università degli studi di Palermo, Italy (59) Anthropological Center, Croatian Academy of  
93 Sciences and Arts, 10000 Zagreb, Croatia (60) Regional Historical Museum Varna, Maria Luiza Blvd. 41, BG-  
94 9000 Varna, Bulgaria (61) National Museum in Belgrade, 1a Republic sq., Belgrade, Serbia (62) Department of  
95 Human Evolution, Max Planck Institute for Evolutionary Anthropology, 04103 Leipzig, Germany (63) Department  
96 of Anthropology, Natural History Museum Vienna, 1010 Vienna, Austria (64) INRAP/UMR 8215 Trajectoires, 21  
97 Allée de l’Université, 92023 Nanterre, France (65) CNRS/UMR 7041 ArScAn MAE, 21 Allée de l’Université,  
98 92023 Nanterre, France (66) Institute of Ethnology and Anthropology, Russian Academy of Sciences, Leninsky  
99 Pr., 32a, Moscow, 119991, Russia (67) Archaeological Museum of Macedonia, Skopje (68) Regional museum of  
100 history, Shumen, Bulgaria (69) Department of Anthropology, University of Toronto, Toronto, Ontario, M5S 2S2,  
101 Canada (70) Institute of Archaeology & Ethnography, Siberian Branch, Russian Academy of Sciences, Lavrentiev  
102 Pr. 17, Novosibirsk 630090, Russia (71) Satu Mare County Museum Archaeology Department, V. Lucaciu, nr.21,  
103 Satu Mare, Romania (72) Municipal Museum Drniš, Domovinskog rata 54, 22320 Drniš, Croatia (73) anthropol -  
104 Anthropologieservice, Schadenweilstraße 80, 72379 Hechingen, Germany (74) Institute for Prehistory, Early  
105 History and Medieval Archaeology, University of Tuebingen, Germany (75) Institute of Latvian History,  
106 University of Latvia, Kalpaka Bulvāris 4, Rīga 1050, Latvia (76) Department of Archaeology, Durham University,  
107 UK (77) School of Environmental Sciences: Geography, University of Hull, Hull HU6 7RX, UK (78) Department  
108 of Biology, Grand Valley State University, Allendale, Michigan, USA (79) Ephorate of Paleoanthropology and  
109 Speleology, Athens, Greece (80) Department of Archaeology, Cardiff University, Cardiff, UK (81) Department of  
110 Anthropology, University of Vienna, Althanstrasse 14, 1090 Vienna, Austria.

## 111 **Abstract**

112 **Farming was first introduced to southeastern Europe in the mid-7<sup>th</sup> millennium BCE–**  
113 **brought by migrants from Anatolia who settled in the region before spreading**  
114 **throughout Europe. However, the dynamics of the interaction between the first farmers**  
115 **and the indigenous hunter-gatherers remain poorly understood because of the near**  
116 **absence of ancient DNA from the region. We report new genome-wide ancient DNA**  
117 **data from 204 individuals–65 Paleolithic and Mesolithic, 93 Neolithic, and 46 Copper,**  
118 **Bronze and Iron Age–who lived in southeastern Europe and surrounding regions**  
119 **between about 12,000 and 500 BCE. We document that the hunter-gatherer populations**  
120 **of southeastern Europe, the Baltic, and the North Pontic Steppe were distinctive from**  
121 **those of western Europe, with a West-East cline of ancestry. We show that the people**  
122 **who brought farming to Europe were not part of a single population, as early farmers**  
123 **from southern Greece are not descended from the Neolithic population of northwestern**  
124 **Anatolia that was ancestral to all other European farmers. The ancestors of the first**  
125 **farmers of northern and western Europe passed through southeastern Europe with**  
126 **limited admixture with local hunter-gatherers, but we show that some groups that**  
127 **remained in the region mixed extensively with local hunter-gatherers, with relatively**  
128 **sex-balanced admixture compared to the male-biased hunter-gatherer admixture that**  
129 **we show prevailed later in the North and West. After the spread of farming,**  
130 **southeastern Europe continued to be a nexus between East and West, with intermittent**  
131 **steppe ancestry, including in individuals from the Varna I cemetery and associated with**  
132 **the Cucuteni-Trypillian archaeological complex, up to 2,000 years before the Steppe**  
133 **migration that replaced much of northern Europe’s population.**

134

## 135 **Introduction**

136 The southeastern quadrant of Europe was the beachhead in the spread of agriculture into  
137 Europe from its source in the Fertile Crescent of southwestern Asia. After the first appearance  
138 of agriculture in the 7<sup>th</sup> millennium BCE<sup>1,2</sup>, southeastern Europe incubated a succession of  
139 Early Neolithic cultures prior to the spread of farming westward via a Mediterranean route  
140 and northwestward via a Danubian route, reaching both Iberia and Central Europe by 5600  
141 BCE.<sup>3,4</sup> Ancient DNA studies have shown that the spread of farming across Europe was  
142 accompanied by a massive movement of people<sup>5-8</sup> closely related to the farmers of  
143 northwestern Anatolia<sup>9-11</sup> but nearly all the evidence about the ancestry of the first farmers in  
144 Europe is from central and far western Europe, with only three individuals reported from  
145 northern Greece<sup>9</sup>. In the millennia following the establishment of agriculture in the Balkan

146 Peninsula, a series of complex societies formed, culminating in large tell settlements and sites  
147 like the mid 5<sup>th</sup> millennium BCE necropolis at Varna, which has some of the earliest evidence  
148 of extreme inequality in wealth, with one individual (ANI152/grave 43) from whom we  
149 extracted DNA buried with more gold than is known from any site prior to that time. By the  
150 end of the 6<sup>th</sup> millennium BCE, agriculture had reached eastern Europe, in the form of the  
151 Cucuteni-Trypillian complex in the area of present-day Moldova, Romania and Ukraine, with  
152 densely settled “mega-sites” in Ukraine housing hundreds, and perhaps thousands, of  
153 people.<sup>12</sup> After around 4000 BCE, these societies further transformed, the tell settlements were  
154 largely abandoned, and there is archaeological evidence of contact with nomadic pastoralist  
155 populations from the Eurasian steppe. However, the population movements that accompanied  
156 these events are not immediately evident from the archaeological record and remain largely  
157 unknown.

158

## 159 Results

160 We generated new genome-wide data from 204 ancient humans (195 reported for the first  
161 time), from the Balkan Peninsula, the Carpathian Basin, the North Pontic Steppe, and  
162 neighboring regions mostly dated to between 12,000 and 1000 BCE (Figure 1A,  
163 Supplementary Data Table 1, Supplementary Information, section 1). To obtain genome-wide  
164 data in an efficient way, we enriched the DNA libraries in solution for sequences overlapping  
165 1.24 million single nucleotide polymorphisms (SNPs) before sequencing.<sup>7,10,13</sup> We filtered out  
166 individuals with low coverage (less than 15,000 SNPs covered by at least one sequence) or  
167 that had unexpected ancestry for their archaeological context and were not directly dated. We  
168 also report data for, but exclude from analysis, nine individuals that were first-degree relatives  
169 of others in the dataset, resulting in an analysis dataset of 195 individuals.

170

171 We applied principal component analysis (PCA; Figure 1B, Extended Data Figure 1), and  
172 supervised and unsupervised ADMIXTURE (Figure 1D, Extended Data Figures 2 and 3)<sup>14</sup> to  
173 obtain an overview of this dataset in terms of population structure. We combined this genetic  
174 assessment of structure with archaeological and chronological information to cluster the  
175 individuals into populations. We used *D*-statistics to evaluate whether pairs of populations  
176 were consistent with being clades<sup>15</sup> and the programs *qpAdm* and *qpGraph* to fit mixture  
177 proportions and admixture graphs to the data<sup>15</sup>. To investigate how these individuals fit into  
178 the wider context of European prehistory and present-day genetic diversity, we co-analyzed  
179 them with data from 265 previously reported ancient individuals<sup>9-11,16-28</sup> as well as 799  
180 present-day individuals genotyped on the Illumina “Human Origins” array<sup>24</sup>, and 300 high  
181 coverage genomes from the Simons Genome Diversity Project<sup>29</sup> (SGDP).

## 182 **Hunter-Gatherer substructure and transitions**

183 We report new genome-wide data for 101 individuals from Paleolithic, Mesolithic and eastern  
184 European Neolithic contexts. In eastern Europe, the term “Neolithic” often refers to the  
185 presence of pottery<sup>30-32</sup> (and may not include a transition to agricultural subsistence which is  
186 the key criterion for the use of these terms in western Europe). Because of the differences in  
187 meaning across our region of study, we avoid the use of “Neolithic” as a general term and use  
188 terms corresponding to economic subsistence strategy (either “hunter-gatherer” or “farmer”),  
189 or genetic ancestry (we use “hunter-gatherer ancestry” to refer to genetic ancestry derived  
190 from a population closely related to Mesolithic Europeans, and “farmer ancestry” to refer to  
191 ancestry derived from a population like northwestern Anatolian farmers).

192

193 Hunter-gatherers from central Europe have both western and eastern European hunter-  
194 gatherer ancestry (WHG and EHG) – a cline that is clearly visible in PCA (Figure 1B). This  
195 motivated us to investigate whether genetic population structure of Mesolithic and Early  
196 Neolithic hunter-gatherers in Europe was determined purely by physical distance. We fit  
197 admixture proportions with *qpAdm* and also a model estimating a spatially continuous  
198 migration surface under an isolation-by-distance model,<sup>33</sup> and inferred a migration barrier  
199 separating populations that are predominantly WHG from EHG, but with some diffusion of  
200 ancestry across this boundary (Figure 2A). However, we also show that this frontier was not  
201 static, with dramatic local shifts in ancestry over time (Figure 2B) and substructure in  
202 phenotypically important variants (Supplementary Information, section 2).

203

204 From present-day Ukraine, our study reports new genome-wide data from 31 hunter-  
205 gatherers: five Mesolithic individuals dating from 9500-6000 BCE, and 26 Neolithic and  
206 Copper Age (“Eneolithic” or “Chalcolithic”) individuals dating from ~6000-3500 BCE. On the  
207 cline from western (WHG) to eastern hunter-gatherer ancestry (EHG, represented by  
208 individuals from Karelia and Samara), the Ukrainian Mesolithic individuals fall towards the  
209 eastern end, intermediate between EHG and hunter-gatherers from Sweden<sup>7</sup>. The Ukrainian  
210 Neolithic population has significant differences in ancestry compared to the Ukrainian  
211 Mesolithic population. A previous study of two individuals (for one of which we generated  
212 new data) from the Mesolithic Vasil’evka 3 and Neolithic Vovnigi 2 sites<sup>34</sup> suggested that  
213 between the Ukrainian Mesolithic and Neolithic there was an increase in Ancient North  
214 Eurasian (ANE) ancestry related to the 24,000-year old Siberian Mal’ta 1.<sup>26</sup> However, our  
215 larger sample shows the opposite – specifically that ANE ancestry decreases and WHG  
216 ancestry increases – as shown by the statistics  $D(\text{Mbuti}, X, \text{Ukraine\_Mesolithic},$   
217  $\text{Ukraine\_Neolithic})$ , which is  $Z=-4.9$  when  $X$  is the Mal’ta 1 individual and  $Z=9.1$  for  
218  $X=\text{WHG}$  (Supplementary Data Table 2).

219 Individuals associated with the Bronze Age Yamnaya Complex from Ukraine, like previously  
220 reported Yamnaya individuals from Samara<sup>7</sup> and Kalmykia<sup>16</sup>, have little evidence of WHG  
221 ancestry, but do have a third source of ancestry related to hunter-gatherers from the Caucasus  
222 <sup>20</sup> (CHG) and early Iranian farmers<sup>23,35</sup> (Supplementary Data Table 3). Two Yamnaya  
223 individuals – one from Oзера in Ukraine and one from Bulgaria (I1917 and Bul4, both dated  
224 to ~3000 BCE) – in addition have evidence of early European farmer related admixture, which  
225 is the first evidence of such ancestry in Yamnaya individuals (Figure 1B,D, Supplementary  
226 Data Table 2). Similarly, one Copper Age individual (I4110) dated to ~3600-3400 BCE from  
227 Dereivka in Ukraine has both CHG and farmer ancestry (Figure 1D, Supplementary Data  
228 Table 2). This is by far the earliest appearance of farmer ancestry this far East in Eurasia,  
229 which was previously not known on the Steppe until the Srubnaya Complex after ~1800 BCE.

230  
231 At Zvejnieki in Latvia (17 newly reported individuals, added to 5 first reported in Ref. 34 for  
232 which we report additional data here) there is a transition in hunter-gatherer ancestry that is  
233 the opposite of that seen in Ukraine. Consistent with similar data from the Baltic States<sup>34,36,37</sup>,  
234 we find that Mesolithic and Early Neolithic individuals associated with the Kunda and Narva  
235 cultures had ancestry that was genetically intermediate between western and eastern hunter-  
236 gatherers (we estimate 70% WHG and 30% EHG, but perhaps with some differential  
237 relatedness to ANE, relative to EHG; Supplementary Data Table 3). However, there is a  
238 dramatic shift between the Early Neolithic and the Middle Neolithic Comb Wear Complex,  
239 who are almost entirely EHG in ancestry (we estimate 73% EHG, but two out of four  
240 individuals appear almost 100% EHG in PCA space). The most recent individual, associated  
241 with the Final Neolithic Corded Ware Complex, provides evidence of yet another transition,  
242 clustering closely with Yamnaya from Samara<sup>7</sup>, Kalmykia<sup>16</sup> and Ukraine.

243  
244 We report new data from hunter-gatherers from France, Sicily and Croatia, as well as higher  
245 coverage data from three previously published hunter-gatherers from France and Germany.<sup>18</sup>  
246 The Sicilian and Croatian individuals dating to 12,000 and 6100 BCE cluster closely with  
247 western hunter-gatherers, including individuals from Loschbour<sup>24</sup> (Luxembourg, 6100 BCE),  
248 Bichon<sup>20</sup> (Switzerland, 11,700 BCE), and Villabruna<sup>18</sup> (Italy 12,000 BCE). These results  
249 demonstrate that the “western hunter-gatherer” population<sup>24</sup> was widely distributed from the  
250 Atlantic seaboard of Europe in the West, to Sicily in the South, to the Balkan Peninsula in the  
251 Southeast, for at least six thousand years, strengthening the evidence that the western hunter-  
252 gatherers represent a population that expanded from a southeastern European refugium  
253 following the last Ice Age around 15,000 years ago—in the process displacing or admixing  
254 with the existing population of western Europe.<sup>18 38</sup>

255

256 A particularly important hunter-gatherer population that we newly report in this study is from  
257 the Iron Gates region that straddles the border of present-day Romania and Serbia. This  
258 region is close to the route taken by farmer migrants on their way from the Balkans to central  
259 Europe, and the population is represented in our study by 35 individuals from the Iron Gates  
260 sites of Hajdučka Vodenica, Ostrovul Corbului, Padina, Schela Cladovei and Vlasac, one  
261 individual (I2534) with similar (but more EHG) hunter-gatherer ancestry from the Early  
262 Neolithic site of Măgura Buduiasca 250km east of the Iron Gates, and two individuals with  
263 farmer ancestry from the Mesolithic-Neolithic site of Lepenski Vir. Modeling Iron Gates  
264 hunter-gatherers as a mixture of WHG and EHG (Supplementary Table 3) shows that they are  
265 – as expected given their geographic location and the hunter-gatherer ancestry cline –  
266 intermediate between WHG (87%) and EHG (13%). However, this *qpAdm* model does not fit  
267 well ( $p=0.0003$ , Supplementary table 3) and we note that the Iron Gates hunter-gatherers  
268 carry mitochondrial haplogroups K1 (8/36) as well as other subclades of haplogroup U  
269 (27/36) and haplogroup H (1/36). This contrasts with WHG, EHG and Scandinavian hunter-  
270 gatherers who almost all carry haplogroup U5 or U2. Therefore the Iron Gates hunter-  
271 gatherers have ancestry that is not present in WHG or EHG. This suggests either genetic  
272 contact between the ancestors of the Iron Gates population and hunter-gatherers from  
273 Anatolia, or that the Iron Gates population is related to the source population from which the  
274 WHG split off during a post-LGM re-expansion into Europe.

275

276 In contrast, the two individuals (I4665 and I4666, dated to 6205-5907 calBCE and 6222-5912  
277 calBCE respectively) that we sampled from Iron Gates site of Lepenski Vir are genetically  
278 farmers rather than hunter-gatherers, despite having been buried in the local Mesolithic  
279 tradition. Strontium isotope data shows that many of the individuals buried after ~6100 BCE at  
280 Lepenski Vir—including one of the two that we sampled (I4665, burial 54E)—were not  
281 originally from the Danube Gorges.<sup>39</sup> These observations, combined with one individual from  
282 Padina (I5232), dated to 6061-5841 calBCE that has both farmer and hunter-gatherer  
283 ancestry, demonstrates that the Iron Gates region was one where farmer and hunter-gatherer  
284 groups interacted both genetically and culturally, and provides a window into the first few  
285 generations of interactions between these disparate groups.

286

### 287 **Population structure and transformation of farmers in southeast Europe**

288 Neolithic populations from present-day Bulgaria, Croatia, Macedonia, Serbia and Romania  
289 cluster closely with the Neolithic populations of northwestern Anatolia (Figure 1). Modeling  
290 Balkan Neolithic populations as a mixture of Anatolia Neolithic, western hunter-gatherer and  
291 Ukraine Mesolithic, we estimate that Balkan Neolithic populations derive 98% (95%  
292 confidence interval [CI]; 97-100%) of their ancestry from populations related to those of the

293 northwestern Anatolian Neolithic. A striking exception to the pattern of limited hunter-  
294 gatherer admixture in Balkan Neolithic populations is evident in 8 out of 9 individuals from  
295 Malak Preslavets, a site in present-day Bulgaria close to the Danube river.<sup>40</sup> These individuals  
296 likely lived in the mid-6<sup>th</sup> millennium BCE and have significantly more hunter-gatherer  
297 ancestry than other Balkan Neolithic individuals as shown by PCA and ADMIXTURE as well  
298 as *D*-statistics and *qpAdm* modeling (Figure 1B,D, Extended Data Figures 1-3,  
299 Supplementary Data Tables 2-4). We find that a model of 82% (CI: 77-86%) Anatolian  
300 Neolithic, 15% (CI: 12-17%) WHG, and 4% (CI: 0-9%) EHG ancestry is a good fit to the  
301 data. This hunter-gatherer ancestry with a ~4:1 WHG:EHG ratio plausibly represents a  
302 contribution from local Balkan hunter-gatherers like those that we sampled from the Iron  
303 Gates. By the Late Mesolithic, hunter-gatherers populations in the Balkans were likely  
304 concentrated in sites along the coast and major rivers such as the Danube,<sup>41</sup> which directly  
305 connects the Iron Gates with Malak Preslavets. This suggests a heterogeneous landscape of  
306 farmer populations with different proportions of hunter-gatherer ancestry during the early  
307 Neolithic, and that farmer groups with the most hunter-gatherer ancestry, like those at Malak  
308 Preslavets and, possibly, Lepenski Vir were those that lived close to the highest densities of  
309 hunter-gatherers.

310

311 In the Balkans, Copper Age populations have significantly more hunter-gatherer ancestry than  
312 Neolithic populations as shown, for example, by the statistic *D*(Mbuti, WHG,  
313 Balkans\_Neolithic, Balkans\_Chalcolithic); *Z*=5.18 ( Supplementary Data Table 2). This is  
314 consistent with changes in funeral rites<sup>42</sup> and roughly contemporary with the “resurgence” of  
315 hunter-gatherer ancestry previously reported in central Europe and Iberia<sup>7,10,43</sup>.

316

317 We also report the first data from the Late Neolithic Globular Amphora Complex. Globular  
318 Amphora individuals from two sites in Poland and Ukraine form a tight genetic cluster,  
319 showing genetic homogeneity over a large distance (Figure 1B,D). We find that this  
320 population had more hunter-gatherer ancestry than Middle Neolithic groups from Central  
321 Europe<sup>7</sup> (we estimate 25% [CI: 22-27%] WHG ancestry, similar to Chalcolithic Iberia). This  
322 finding further extends our knowledge of the variable landscape of hunter-gatherer and farmer  
323 admixture proportions in Europe (Supplementary Data Table 3). In east-central Europe, the  
324 Globular Amphora Complex immediately precedes the Corded Ware Complex that marks the  
325 first appearance of steppe ancestry in the region.<sup>7,16</sup> The Globular Amphora abutted  
326 populations with steppe-influenced material cultures for hundreds of years and yet the  
327 individuals in our study have no evidence of steppe ancestry, suggesting that this persistent  
328 culture frontier corresponded to a genetic barrier.

329



330 The migrations from the Pontic-Caspian steppe associated with the Yamnaya Cultural  
331 Complex in the 3<sup>rd</sup> millennium BCE made a profound contribution to the genetic ancestry of  
332 central Europe, contributing about 75% of the ancestry of individuals associated with the  
333 Corded Ware Complex and about 50% of the ancestry of succeeding material cultures such as  
334 the Bell Beaker Complex.<sup>7,16</sup> In a few individuals from southeastern Europe, we find evidence  
335 of steppe-related ancestry far earlier (defined here as a mixture of EHG and CHG similar to  
336 the genetic signature of individuals of the later Yamnaya; Figure 1B,D). One individual  
337 (ANI163) from the Varna I cemetery dates to 4711-4550 BCE, one (I2181) from nearby  
338 Smyadovo dates to 4550-4450 BCE, and a third individual (I1927) from Verteba cave,  
339 associated with the Cucuteni-Trypillian complex, dates to 3619-2936 BCE. These findings  
340 push back by almost 2000 years the first evidence of steppe ancestry this far West in Europe,  
341 demonstrating the resumption of genetic contact between southeastern Europe and the Steppe  
342 that also occurred in the Mesolithic. Other Copper Age (~5000-4000 BCE) individuals from  
343 the Balkans have little evidence of steppe ancestry, but Bronze Age (~3400-1100 BCE)  
344 individuals do (we estimate 30%; CI: 26-35%). The four latest Balkan Bronze Age  
345 individuals in our data (later than ~1700 BCE) all have more steppe ancestry than earlier  
346 Bronze Age individuals (3200-2500 BCE; Figure 1D), showing that the contribution of the  
347 Steppe to southeast European populations increased further during the Bronze Age.

348

#### 349 **New evidence about the spread of farming into, and throughout, Europe**

350 This study resolves two open questions about the initial spread of farming into Europe. The  
351 first is the question of whether the first farmers of the Danubian Route that brought  
352 agriculture to northern Europe along the Danube River valley, and those that spread along the  
353 Mediterranean coast to Iberia and other southern European locations, were derived from a  
354 single ancestral population or instead represent separate migrations from different Anatolian  
355 sources. A challenge in studying the relationship among Early Neolithic populations is the  
356 different proportions of hunter-gatherer ancestry they carry, which obscures the more subtle  
357 differences between their farmer ancestries. One approach to this problem is to explicitly  
358 model both sources of ancestry using an admixture graph (Supplementary Information,  
359 section 3). We confirm that Mediterranean populations, represented in our study by  
360 individuals of the Impressa complex from Croatia and the Epicardial Early Neolithic from  
361 Spain<sup>7</sup>, are closely related to the Danubian population represented by the *Linearbandkeramik*  
362 (LBK) from central Europe<sup>7,44</sup> and show that both groups are closely related to the Balkan  
363 Neolithic population. These three populations form a clade with Northwest Anatolians as an  
364 outgroup, consistent with a single migration from a population closely related to the  
365 northwestern Anatolian Neolithic farming population into the Balkan peninsula, which then  
366 split into two populations that followed the Danubian and Mediterranean routes.

367

368 A related question about the spread of farming into Europe concerns whether its initial arrival  
369 in present-day Greece and subsequent expansion was mediated by a single population  
370 migrating from Anatolia – as has been consistent with genetic data up until now<sup>9</sup> – or whether  
371 there were multiple initial groups, as suggested by the archaeological record.<sup>45,46</sup> We find that  
372 four southern Greek (Peloponnese) Neolithic individuals – three from Diros Cave and one  
373 from Franchthi Cave, plus one previously published individual from Diros<sup>27</sup> – are not  
374 consistent with descending from the same source population as other European farmers. In  
375 PCA these individuals are outliers; shifted away from northwestern Anatolian and European  
376 Early Neolithic individuals, in a direction opposite from WHG. *D*-statistics (Supplementary  
377 Data Table 2) show that in fact, these “Peloponnese Neolithic” individuals have less WHG-  
378 related ancestry than Anatolia Neolithic ones, and that they form an outgroup relative to  
379 Anatolian and Balkans Neolithic populations, suggesting an independent migration into  
380 Europe from a population that split off from the ancestors of the northwest Anatolian  
381 individuals from which we have data. Admixture graph modeling (Supplementary  
382 Information, section 3) supports this interpretation, confirming that their Near Eastern  
383 ancestry is derived from a lineage that is close, or basal, to the non-WHG component of  
384 Anatolian Neolithic ancestry. One possibility is that this independent migration is related to  
385 an earlier Aceramic Neolithic in Greece that was derived from the pre-pottery Neolithic  
386 (PPNB) of Cyprus and the Levant<sup>46</sup>. Under this model, the earliest Neolithic populations in  
387 Greece migrated from the Levant, perhaps via the southwestern Anatolian coast as early as  
388 7000 BCE,<sup>45,46</sup> but the majority of Neolithic ancestry arrived around 500 years later via a route  
389 that passed through northwestern Anatolia. The predictions of this hypothesis could be further  
390 tested with genome-wide data of Early Neolithic individuals from Cyprus, Crete and  
391 southwest Anatolia. Populations related to the Peloponnese Neolithic potentially made a small  
392 contribution to the ancestry of other Mediterranean Neolithic populations like Early Neolithic  
393 Iberia and Neolithic farmers from northern Greece<sup>9</sup> but we do not strongly reject models  
394 without such a contribution (Supplementary Information, section 3).

395

### 396 **Sex-biased admixture between hunter-gatherers and farmers**

397 We provide the first evidence for sex-biased admixture between hunter-gatherers and farmers  
398 in Europe, showing that the Middle Neolithic “resurgence” of hunter-gatherer ancestry<sup>7,43</sup> in  
399 central Europe and Iberia was driven more by male than by female hunter-gatherers (Figure  
400 3B&C, Supplementary Data Table 5). One way of detecting this is to compare ancestry  
401 proportions on the autosomes and the X chromosome. Since males always inherit their X  
402 chromosome from their mothers, differences between ancestry on the autosomes and  
403 chromosome X imply sex-biased mixture. In the Balkan Neolithic there is no evidence of sex

404 bias using ancestry estimates obtained from *qpAdm* ( $Z=-0.65$  where a positive  $Z$ -score implies  
405 male hunter-gatherer bias), nor in the LBK and Iberian\_Early Neolithic ( $Z=-0.24$  and  $1.04$ ).  
406 However, in the Middle Neolithic and later populations, this effect reverses. In the Balkan  
407 Copper Age there is weak evidence of bias ( $Z=1.77$ ) but in Iberia and central Europe Middle  
408 Neolithic there is clear bias is in favor of male hunter-gatherer ancestry ( $Z=2.98$ , and  $2.77$  in  
409 Iberia Copper Age and central European Middle Neolithic). This result is independently  
410 supported by uniparental markers (Figure 3C). Proportions of typically hunter-gatherer  
411 mitochondrial haplogroups (haplogroup U)<sup>47</sup> are low in all populations and within the  
412 intervals of genome-wide ancestry proportions. On the other hand, hunter-gatherer Y  
413 chromosomes (haplogroups I2, R1 and C1)<sup>18</sup> are much more common: 6/7 in the Iberian  
414 Neolithic/Copper Age and 7/8 in Middle-Late Neolithic central Europe (Central\_MN and  
415 Globular\_Amphora). Under a single pulse model of admixture, the autosomal/X chromosome  
416 ancestry proportions imply that in the central European Middle Neolithic population that  
417 shows the strongest evidence of sex bias, 35-50% of the male ancestors were hunter-  
418 gatherers, compared to 0-5% of the female ancestors (Extended Data Figure 4).

419

420 The merging of hunter-gatherer and farmer populations was a dynamic process that unfolded  
421 over thousands of years, and proceeded in a profoundly different way in different parts of  
422 Europe. Our analysis shows that in some places – for example at Malak Preslavets in Bulgaria  
423 – there was extensive mixing between hunter-gatherers and farmers, likely driven by the high  
424 local hunter-gatherer population density. In other places—in particular in western, central and  
425 northern Europe—hunter-gatherers and farmers lived in close proximity for long periods of  
426 time with minimal mixture<sup>6,43,48</sup>. When they did finally mix, we find evidence that the hunter-  
427 gather admixture was male-biased, implying a different dynamic. Farming was initially  
428 unable to expand widely in central and northern Europe because early farming techniques  
429 were only suitable for specific regions within the loess belt of the northern European plain.  
430 Thus, northern and central European hunter-gatherers were protected from the demographic  
431 impact of farming migrations, resulting in persistent frontiers between farmers and hunter-  
432 gatherers.<sup>49,50</sup> This may have given hunter-gatherers and farmers time to learn from each other  
433 and interact in a different way than during the more rapid expansion of the first farmers in the  
434 South.

435

#### 436 **No evidence of Copper Age Balkans-to-Anatolia migration**

437 One version of the Steppe Hypothesis of Indo-European language origins suggests that Proto-  
438 Indo European languages developed in the steppe north of the Black and Caspian seas, and  
439 that the earliest known diverging branch – Anatolian – was spread into Asia Minor by  
440 movements of steppe peoples through the Balkan peninsula during the Copper Age around

441 4000 BCE, as part of the same incursions from the steppe that coincided with the decline of  
442 the tell settlements.<sup>51</sup> If this were correct, then one way to detect evidence of it would be the  
443 appearance of large amounts of characteristic steppe ancestry first in the Balkan Peninsula,  
444 and then in Anatolia. However, our genetic data do not support this scenario. While we find  
445 steppe ancestry in Balkan Copper Age and Bronze Age individuals, this ancestry is sporadic  
446 across individuals in the Copper Age, and at low levels in the Bronze Age. Moreover, while  
447 Bronze Age Anatolian individuals<sup>27</sup> have CHG / Iran Neolithic related ancestry, they have  
448 neither the EHG ancestry characteristic of all steppe populations sampled to date<sup>20</sup>, nor the  
449 WHG ancestry that is ubiquitous in southeastern Europe in the Neolithic (Figure 1A,  
450 Supplementary Data Table 2, Supplementary Information section 1). This pattern is consistent  
451 with that seen in northwestern Anatolia<sup>11</sup> and later in Copper Age Anatolia<sup>23</sup>, suggesting  
452 continuing migration into Anatolia from the East rather than from Europe.

453

454 An alternative hypothesis is that the ultimate homeland of Proto-Indo European languages  
455 was in the Caucasus or in Iran. In this scenario, westward movement contributed to the  
456 dispersal of Anatolian languages, and northward movement and mixture with EHG was  
457 responsible for the formation of the population associated with the Yamnaya complex. These  
458 steppe pastoralists plausibly spoke a “Late Proto-Indo European” language that is ancestral to  
459 many of the non-Anatolian branches of the Indo-European language family.<sup>52</sup> On the other  
460 hand, our data could still be consistent with the Steppe-Balkans-Anatolia route hypothesis  
461 model, albeit with constraints. It remains possible that populations dating to around 1600  
462 BCE in the regions where the Indo-European Luwian, Hittite and Palaic languages were  
463 spoken did have European hunter-gatherer ancestry. However, our results would require that  
464 such ancestry was not ubiquitous in Bronze Age Anatolia, and was perhaps tightly linked to  
465 Indo-European speaking groups. We predict that additional insight about the genetic origins  
466 of the potential speakers of early Indo-European languages will be obtained when ancient  
467 DNA data become available from additional sites in this key period in Anatolia and the  
468 Caucasus.

## 469 Discussion

470 Our study shows that southeastern Europe consistently served as a genetic contact zone  
471 between different populations. This role likely contributed to the extraordinary series of  
472 cultural innovations that characterize the region, from the elegant figurines of the Neolithic to  
473 the ornaments and precious metalwork of Varna. Before the arrival of farming, this region  
474 saw constant interaction between highly diverged groups of hunter-gatherers, and this  
475 interaction continued, perhaps accelerating, after the arrival of farming. We find evidence that  
476 some early farmers from Greece derived ancestry from a different source compared to the one

477 that contributed the majority of ancestry of all other farmers in Europe. In eastern Europe we  
478 document the appearance of CHG/Iranian Neolithic ancestry north of the Black Sea, and its  
479 eventual extension as far north as the Baltic. In some ways, this expansion parallels the  
480 expansion of Anatolian farmer ancestry into western Europe although it is less dramatic, and  
481 several thousand years later. These expansions set up the two, largely separate, populations in  
482 western and eastern Europe that would come together in the Final Neolithic and Early Bronze  
483 Age to form the ancestry of present-day Europe.

484

485 This study describes key ancestral components that contributed to present-day West Eurasian  
486 genetic diversity. However, the more recent processes that created present-day southeastern  
487 European populations are unknown, and understanding this will require dense sampling of  
488 Bronze Age, Iron Age, Roman, and Medieval groups and comparison to present-day  
489 populations. At the most ancient end of our time series, while information about hunter-  
490 gatherer population structure in northern and western Europe now extends back throughout  
491 the Upper Paleolithic,<sup>18</sup> we have little data about how these populations fit into a wider  
492 Eurasian context, and more data from hunter-gatherer populations in Anatolia, the Near East  
493 and East Asia will be needed to resolve that question. Finally, many questions about the  
494 nature of the interactions between populations remain unresolved. For example, we report  
495 evidence for sex-bias in one particular set of interactions between hunter-gatherers and  
496 farmers, and other interactions may have had similar dynamics<sup>37,53</sup>. However, many more  
497 examples of such interactions need to be collected before it will become possible to make  
498 generalizable claims about the patterns of sex-biased interactions among human populations  
499 as they came into contact and mixed during prehistory.

## 500 **Methods**

501

### 502 **Ancient DNA Analysis**

503 We extracted DNA and prepared next-generation sequencing libraries in four different  
504 dedicated ancient DNA laboratories (Adelaide, Boston, Budapest, and Tuebingen). Sample  
505 powder was also generated in a fifth laboratory (Dublin) and sent to Boston for DNA  
506 extraction and library preparation (Supplementary Table 1).

507

508 Two samples were processed at the Australian Centre for Ancient DNA, Adelaide, Australia,  
509 according to previously published methods<sup>7</sup> and sent to Boston for subsequent screening,  
510 1240k capture and sequencing.

511

512 Seven samples were processed as previously described<sup>28</sup> at the Institute of Archaeology RCH  
513 HAS, Budapest, Hungary, and amplified libraries were sent to Boston for screening, 1240k  
514 capture and sequencing.

515

516 Seventeen samples were processed at the Institute for Archaeological Sciences of the  
517 University of Tuebingen and at the Max Planck Institute for the Science of Human History in  
518 Jena, Germany. Extraction<sup>54</sup> and library preparation<sup>55,56</sup> followed established protocols. We  
519 performed in-solution capture as described below (“1240k capture”) and sequenced on an  
520 Illumina HiSeq 4000 or NextSeq 500 for 76bp either single or paired-end.

521

522 The remaining 195 samples were processed at Harvard Medical School, Boston, USA. From  
523 about 75mg of sample powder from each sample (extracted in Boston or University College  
524 Dublin, Dublin, Ireland), we extracted DNA following established methods<sup>54</sup> replacing the  
525 column assembly with the column extenders from a Roche kit.<sup>57</sup> We prepared double  
526 barcoded libraries with truncated adapters from between a ninth to a third of the DNA extract.  
527 Most libraries included in the nuclear genome analysis (90%) were subjected to partial  
528 (“half”) Uracil-DNA-glycosylase (UDG) treatment before blunt end repair. This treatment  
529 reduces by an order of magnitude the characteristic cytosine-to-thymine errors of ancient  
530 DNA data<sup>58</sup>, but works inefficiently at 5' ends,<sup>56</sup> and thereby leaves a signal of characteristic  
531 damage at the terminal ends of ancient sequences. Some libraries were not UDG treated  
532 (“minus”). For some samples we increased coverage by preparing additional libraries from  
533 the existing DNA extract using the partial UDG library preparation, but replacing the  
534 MinElute column cleanups in between enzymatic reactions with magnetic bead cleanups, and  
535 the final PCR cleanup with SPRI bead cleanup.<sup>59,60</sup>

536

537 We screened all libraries from Adelaide, Boston and Budapest by enriching for the  
538 mitochondrial genome plus about 3000 (50 in an earlier, unpublished, version) nuclear SNPs  
539 using a bead-capture<sup>61</sup> but with the probes replaced by amplified oligonucleotides synthesized  
540 by CustomArray Inc. After the capture, the adapter sites were completed by PCR, and thereby  
541 dual index combinations<sup>62</sup> were attached to each enriched library. We sequenced the products  
542 of between 100 and 200 libraries together with the non-enriched libraries (shotgun) on an  
543 Illumina NextSeq500 using v2 150 cycle kits for 2x76 cycles and 2x7 cycles.

544

545 In Boston, We performed two rounds of in-solution enrichment (“1240k capture”) for a  
546 targeted set of 1,237,207 SNPs using previously reported protocols.<sup>7,13,24</sup> When we enriched  
547 additional libraries to increase coverage, multiple libraries from the same sample were pooled  
548 in equimolar ratios before the capture. All sequencing was performed on an Illumina  
549 NextSeq500 using v2 150 cycle kits for 2x76 cycles and 2x7 cycles. We attempted to  
550 sequence each enriched library up to the point where we estimated that it was economically  
551 inefficient to sequence further. Specifically, we iteratively sequenced more and more from  
552 each individual and only stopped when we estimated that the expected increase in the number  
553 of targeted SNPs hit at least once would be less than about one for every 100 new read pairs  
554 generated. After sequencing, we removed individuals with evidence of contamination based  
555 on mitochondrial DNA polymorphism<sup>63</sup> or difference in PCA space between damaged and  
556 undamaged reads<sup>64</sup>, a high rate of heterozygosity on chromosome X despite being male<sup>64,65</sup>, or  
557 an atypical ratio of X to Y sequences. We report, but do not analyze, data from 17 individuals  
558 that had low coverage (less than 15,000 SNPs hit on the autosomes), were first-degree  
559 relatives of others in the dataset, or were undated and had unusual ancestry for their  
560 archaeological context.

561

562 After removing a small number of sites that failed to capture, we were left with a total of  
563 1,233,013 sites of which 32,670 were on chromosome X and 49,704 were on chromosome Y,  
564 with a median coverage at targeted SNPs on the 138 new individuals of 0.73 (range 0.017-  
565 9.2; Supplementary Table 1). We generated “pseudo-haploid” calls by selecting a single read  
566 randomly for each individual at each SNP. Thus, there is only a single allele from each  
567 individual at each site, but adjacent alleles might come from either of the two haplotypes of  
568 the individual. We merged the newly reported data with previously reported data from 266  
569 other ancient individuals<sup>9-11,16-28</sup>, making pseudo haploid calls in the same way at the 1240k  
570 sites for individuals that were shotgun sequenced rather than captured.

571

572 Using the captured mitochondrial sequence from the screening process, we called  
573 mitochondrial haplotypes. Using the captured SNPs on the Y chromosome, we called Y  
574 chromosome haplogroups for males by restricting to sequences with mapping quality  $\geq 30$  and  
575 bases with base quality  $\geq 30$ . We determined the most derived mutation for each individual,  
576 using the nomenclature of the International Society of Genetic Genealogy  
577 (<http://www.isogg.org>) version 11.110 (21 April 2016).

578

### 579 **Population genetic analysis**

580 To analyze these ancient individuals in the context of present day genetic diversity, we  
581 merged them with the following two datasets:

582

- 583 1. 300 high coverage genomes from a diverse worldwide set of 142 populations  
584 sequenced as part of the Simons Genome Diversity Project<sup>29</sup> (SGDP merge).  
585
- 586 2. 799 West Eurasian individuals genotyped on the Human Origins array<sup>24</sup>, with  
587 597,573 sites in the merged dataset (HO merge).

588

589 We computed principal components of the present-day individuals in the HO merge and  
590 projected the ancient individuals onto the first two components using the “*lsqproject: YES*”  
591 option in *smartpca (v15100)*<sup>66</sup> (<https://www.hsph.harvard.edu/alkes-price/software/>).

592

593 We ran *ADMIXTURE (v1.3.0)* in both supervised and unsupervised mode. In supervised mode  
594 we used only the ancient individuals, on the full set of SNPs, and the following population  
595 labels fixed (so, for  $k=4$ , we used labels 1-4 in the list below, for example):

- 596 1. *Anatolia\_Neolithic*
- 597 2. *WHG*
- 598 3. *EHG*
- 599 4. *Yamnaya*
- 600 5. *Ukraine\_Mesolithic*
- 601 6. *SHG*

602 For unsupervised mode we used the HO merge, including 799 present-day individuals. We  
603 flagged individuals that were genetic outliers based on PCA and ADMIXTURE, relative to  
604 other individuals from the same time period and archaeological culture.

605

606 We computed *D*-statistics using *qpDstat (v710)*, and fitted admixture proportions with *qpAdm*  
607 (*v610* and admixture graphs with *qpGraph (v6021)*<sup>15</sup> (<https://github.com/DReichLab/>  
608 *AdmixTools*), in each case using the SGDP merge. We computed standard errors for Z scores  
609 with the default block jackknife parameters. For *qpAdm* we used the following set of seven  
610 populations as outgroups or “right populations”:



- 611 • *Mbuti.DG*
- 612 • *Ust\_Ishim\_HG\_published.DG*
- 613 • *Mota.SG*
- 614 • *MA1\_HG.SG*
- 615 • *Villabruna*
- 616 • *Papuan.DG*
- 617 • *Onge.DG*
- 618 • *Han.DG*

619

620 For some analyses (Extended Data Table 4) we used an extended set of 14 right populations,  
621 including additional Upper Paleolithic European individuals<sup>18</sup>:

- 622 • *ELMiron*
- 623 • *Mota.SG*
- 624 • *Mbuti.DG*
- 625 • *Ust\_Ishim\_HG\_published.DG*
- 626 • *MA1\_HG.SG*
- 627 • *AfontovaGora3*
- 628 • *GoyetQ116-1\_published*
- 629 • *Villabruna*
- 630 • *Kostenki14*
- 631 • *Vestonice16*
- 632 • *Karitiana.DG*
- 633 • *Papuan.DG*
- 634 • *Onge.DG*
- 635 • *Han.DG*

636

637 For 40 Mesolithic individuals we estimated an effective migration surface using the software  
638 *EEMS* (<https://github.com/dipetkov/eems>)<sup>33</sup>. We computed pairwise differences between  
639 individuals using the *bed2diffs2* program provided with *EEMS*. We set the number of demes  
640 to 400 and defined the outer boundary of the region by the polygon (in latitude-longitude co-  
641 ordinates) [(66,60), (60,10), (45,-15), (35,-10), (35,60)]. We ran the MCMC ten times with  
642 different random seeds, each time with one million burn-in and four million regular iterations,  
643 thinned to one in ten thousand.

644

645 To analyze potential sex bias in admixture, we used *qpAdm* to estimate admixture proportions  
646 on the autosomes (default option) and on the X chromosome (option “*chrom: 23*”). We  
647 computed Z scores for the difference between the autosomes and the X chromosome as

648 
$$Z = \frac{p_A - p_X}{\sqrt{\sigma_A^2 + \sigma_X^2}}$$
 where  $p_A$  and  $p_X$  are the hunter-gatherer admixture proportions on the autosomes

649 and the X chromosome, and  $\sigma_A$  and  $\sigma_X$  are the corresponding jackknife standard deviations.

650 Thus, a positive Z-score means that there is more hunter-gatherer admixture on the autosomes  
651 than on the X chromosome and thus the hunter-gatherer admixture was male-biased. Because  
652 X chromosome standard errors are high and *qpAdm* results can be sensitive to which

653 population is first in the list of outgroup populations, we checked that the patterns we observe  
654 were robust to cyclic permutation of the outgroups. To compare frequencies of hunter-  
655 gatherer uniparental markers we counted the individuals with mitochondrial haplogroup U  
656 and Y chromosome haplogroups C2, I2 and R1 which are all common in Mesolithic hunter-  
657 gatherers but rare or absent in the Anatolian Neolithic. The Iron Gates hunter-gatherers also  
658 carry H and K1 mitochondrial haplogroups so the proportion of haplogroup U represents the  
659 minimum maternal hunter-gatherer contribution. We computed binomial confidence intervals  
660 for the proportion of markers using the Agresti-Coull method<sup>67,68</sup> implemented in the *binom*  
661 package in *R*.

662

663 Given autosomal and X chromosome admixture proportions, we estimated the proportion of  
664 male and female hunter-gatherer ancestors by assuming a single pulse model of admixture. If  
665 the proportions of male and female ancestors that are hunter-gatherer are given by  $m$  and  $f$ ,  
666 respectively, then the proportions of hunter-gatherer ancestry on the autosomes and the X  
667 chromosome are given by  $\frac{m+f}{2}$  and  $\frac{m+2f}{3}$ . We approximated the sampling error in the  
668 observed admixture proportions by the estimated jackknife sampling error, computed the  
669 likelihood surface for  $(m, f)$  over a grid ranging from (0,0) to (1,1).

670

#### 671 **Direct AMS <sup>14</sup>C Bone Dates**

672 We report new direct AMS <sup>14</sup>C bone dates in this study from multiple AMS radiocarbon  
673 laboratories. In general, bone samples were manually cleaned and demineralized in weak HCl  
674 and, in most cases (PSU, UCIAMS, OxA), soaked in an alkali bath (NaOH) at room  
675 temperature to remove contaminating soil humates. Samples were then rinsed to neutrality in  
676 Nanopure H<sub>2</sub>O and gelatinized in HCl.<sup>69</sup> The resulting gelatin was lyophilized and weighed  
677 to determine percent yield as a measure of collagen preservation (% crude gelatin yield).  
678 Collagen was then directly AMS <sup>14</sup>C dated (Beta, AA) or further purified using ultrafiltration  
679 (PSU/UCIAMS, OxA, Poz, Wk, MAMS).<sup>70</sup> It is standard in some laboratories  
680 (PSU/UCIAMS, OxA, Wk) to use stable carbon and nitrogen isotopes as an additional quality  
681 control measure. For these samples, the %C, %N and C:N ratios were evaluated before AMS  
682 <sup>14</sup>C dating. C/N ratios for well-preserved samples fall between 2.9 and 3.6, indicating good  
683 collagen preservation.<sup>71</sup>

684

685 All <sup>14</sup>C ages were  $\delta^{13}\text{C}$ -corrected for mass dependent fractionation with measured <sup>13</sup>C/<sup>12</sup>C  
686 values<sup>72</sup> and calibrated with OxCal version 4.2.3<sup>73</sup> using the IntCal13 northern hemisphere  
687 calibration curve.<sup>73</sup>

688

689 **Acknowledgments**

690 We thank David Anthony, Iosif Lazaridis, and Mark Lipson for comments on the manuscript;  
691 Bastien Llamas and Alan Cooper for supporting laboratory work. Support for this project was  
692 provided by the Human Frontier Science Program fellowship LT001095/2014-L to I.M.; by  
693 DFG grant AL 287 / 14-1 to K.W.A.; by Irish Research Council grant GOIPG/2013/36 to  
694 D.F.; by MEN-UEFISCDI grant, Partnerships in Priority Areas Program – PN II  
695 (PN-II-PT-PCCA-2013-4-2302) to C.L.; by Croatian Science Foundation grant IP-2016-06-  
696 1450 to M.N.; by European Research Council grant ERC StG 283503 and Deutsche  
697 Forschungsgemeinschaft DFG FOR2237 to K.H.; by ERC starting grant ADNABIOARC  
698 (263441) to R.P.; and by US National Science Foundation HOMINID grant BCS-1032255,  
699 US National Institutes of Health grant GM100233, and the Howard Hughes Medical Institute  
700 to D.R.

701 **Figures**

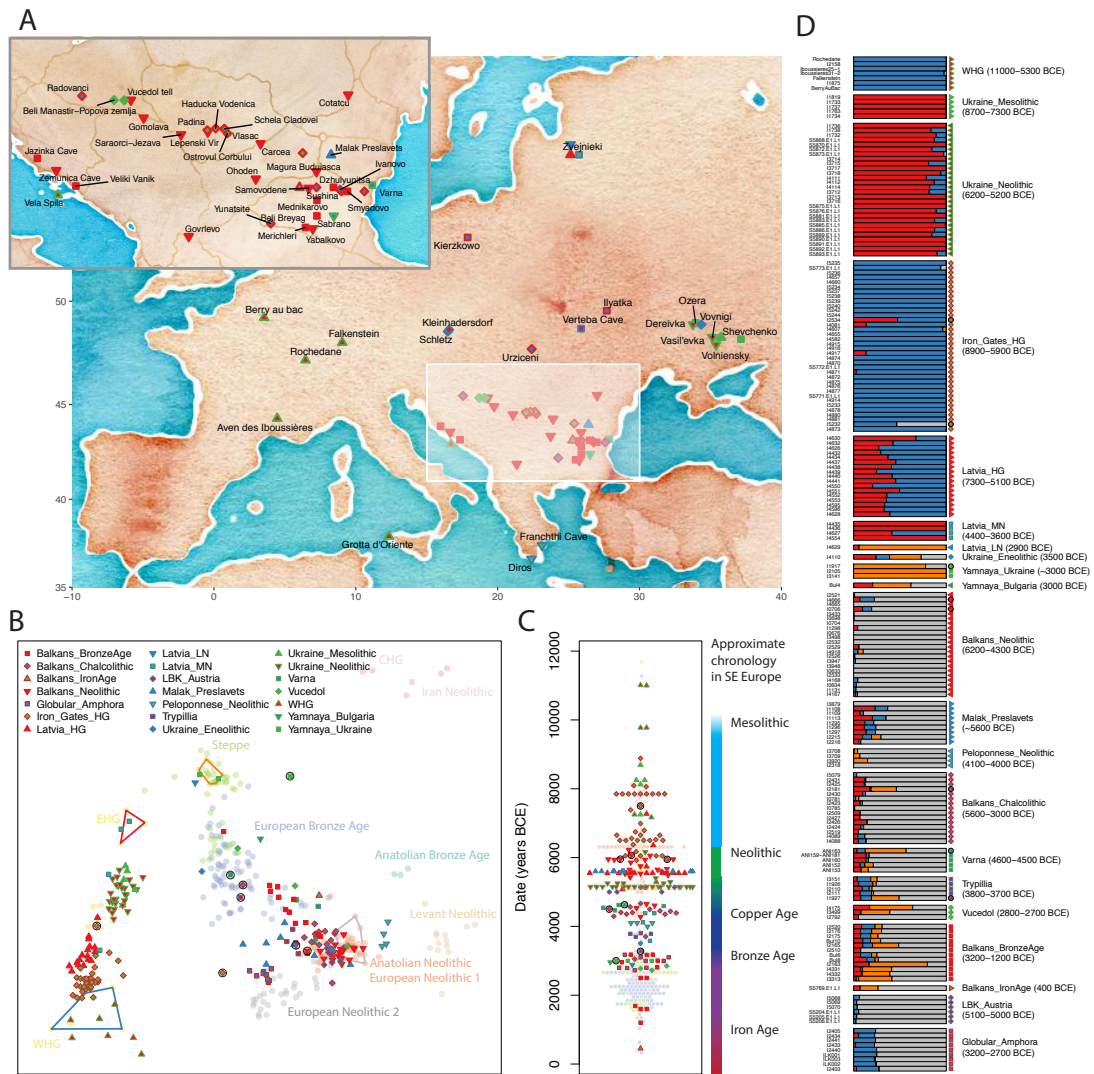

702  
 703 **Figure 1:** Geographic locations and genetic structure of newly reported individuals. **A:**  
 704 Location and groupings of newly reported individuals. **B:** Individuals projected onto axes  
 705 defined by the principal components of 799 present-day West Eurasians (not shown in this  
 706 plot for clarity, but shown in Extended Data Figure 1). Projected points include selected  
 707 published individuals (faded colored circles, labeled) and newly reported individuals (other  
 708 symbols; outliers shown by additional black circles). Colored polygons indicate the  
 709 individuals that had cluster memberships fixed at 100% for the supervised admixture analysis  
 710 in D. **C:** Estimated age (direct or contextual) for each sample. Approximate chronology used  
 711 in southeastern Europe shown to the right **D:** Supervised ADMIXTURE plot, modeling each  
 712 ancient individual (one per row), as a mixture of populations represented by clusters  
 713 containing Anatolian Neolithic (grey), Yamnaya from Samara (orange), EHG (red) and WHG  
 714 (blue). Dates indicate approximate range of individuals in each population. Map tiles in A by  
 715 Stamen Design, under CC BY 3.0. Data by OpenStreetMap, under CC BY SA.

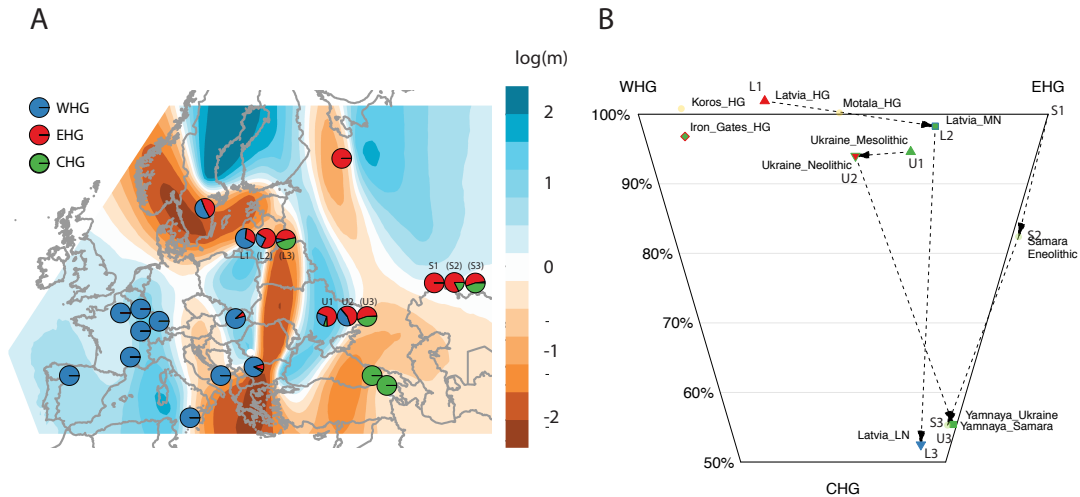

716

717 **Figure 2:** Structure and population change in European populations with mainly hunter-  
718 gatherer ancestry. **Background:** Effective migration surface<sup>33</sup> inferred using 109 Mesolithic  
719 and Early Neolithic genomes. Blue indicates regions of high migration and red regions of low  
720 migration (relative migration rate  $m$ ). **Pies:** Each pie represents one or more individuals. Blue,  
721 red and green segments pies show, respectively, WHG, EHG and CHG ancestry – we chose a  
722 2-population model if it fitted in *qpAdm* with  $p > 0.01$  (Supplementary Data Table 3). Pies with  
723 100% ancestry are those that were fixed as source populations. In Latvia, Samara and  
724 Ukraine, sets of three pies show the transition in ancestries, approximately from Mesolithic-  
725 Neolithic-Yamnaya (Exact labels in panel B). Populations with labels in brackets were not  
726 used to fit the migration surface. **B:** Ancestry transitions for hunter-gatherer populations in the  
727 3-population WHG+EHG+CHG model. Dashed lines show populations with geographic  
728 continuity.

729

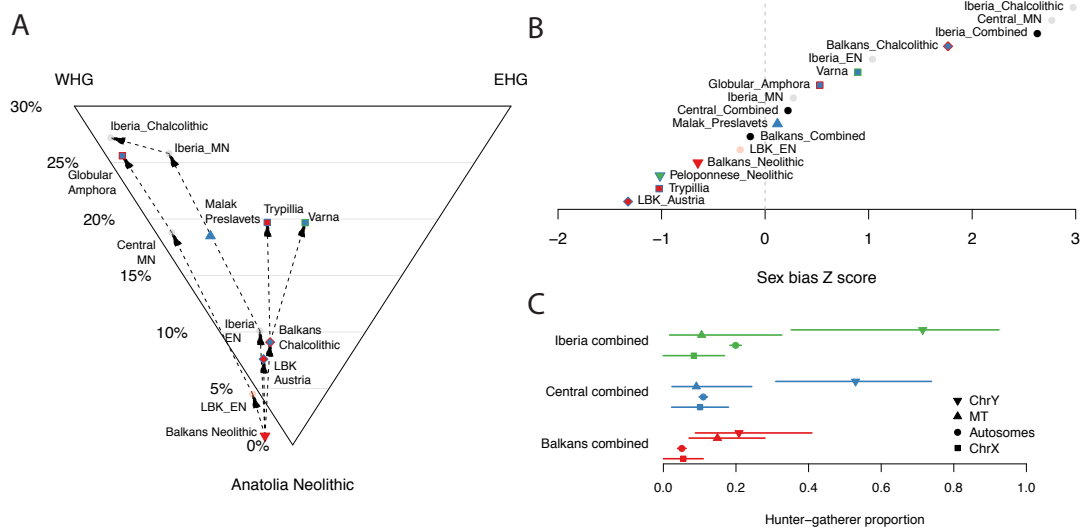

730

731 **Figure 3:** Structure and population change in European populations with farmer ancestry. **A:**  
 732 each population is modeled as a mixture of Anatolia Neolithic, WHG, and EHG. Dashed lines  
 733 show temporal relationships between populations from the same geographic areas with  
 734 similar ancestries. **B:** Z-scores for the difference in hunter-gatherer ancestry on the autosomes  
 735 compared to the X chromosome when populations are modeled as a mixture of Anatolia  
 736 Neolithic and WHG. A positive score indicates that there is more hunter-gatherer ancestry on  
 737 the autosomes and therefore the hunter-gatherer ancestry is male-biased. **C:** Hunter-gatherer  
 738 ancestry proportions on the autosomes, X chromosome, mitochondria (i.e. mt haplogroup U),  
 739 and Y chromosome (i.e. Y chromosome haplogroups I2, R1 and C2). Bars show approximate  
 740 95% confidence intervals.

741

742 **Extended Data Figures**

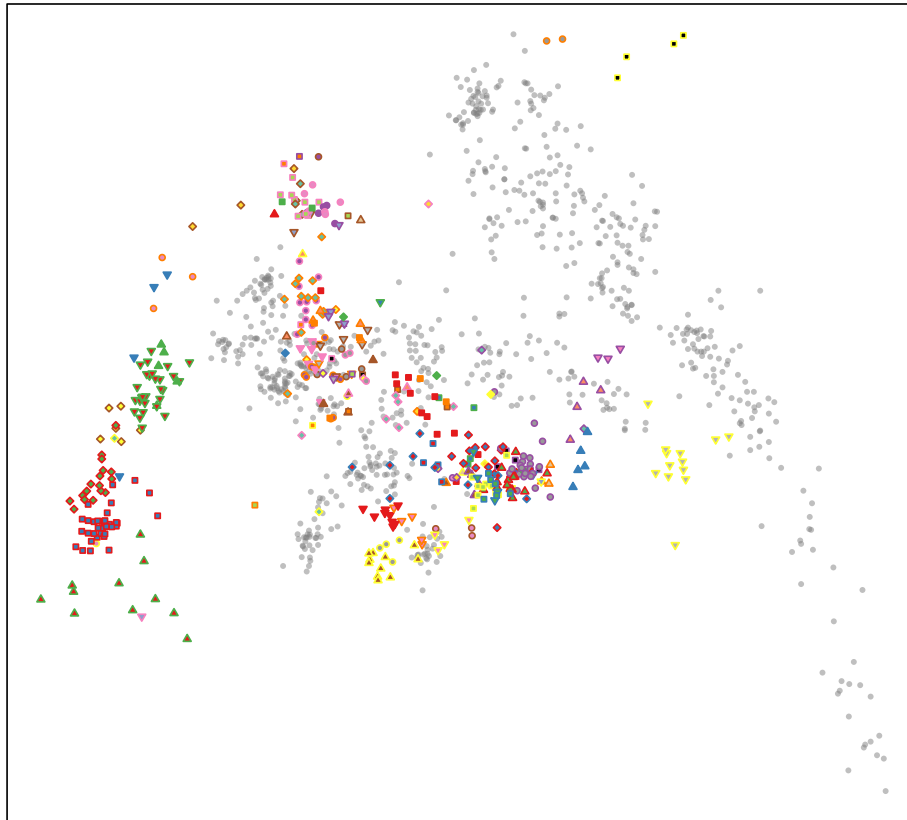

743

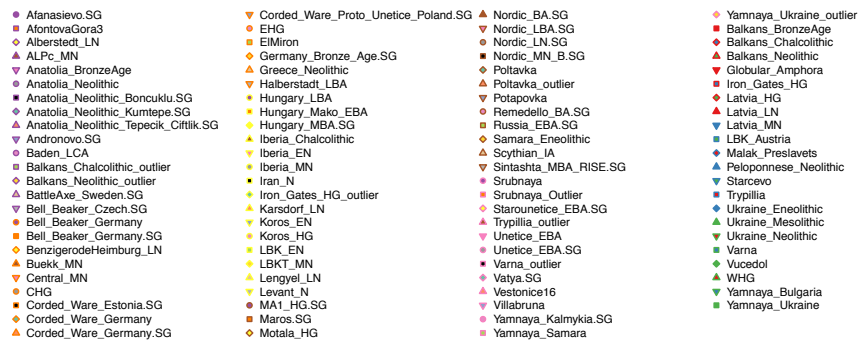

744

745

746 **Extended Data Figure 1: PCA of all ancient individuals, projected onto principal**  
 747 **components defined by 799 present-day West Eurasian individuals. (This differs from Figure**  
 748 **1B in that the plot is not cropped and the present-day individuals are shown.)**

749

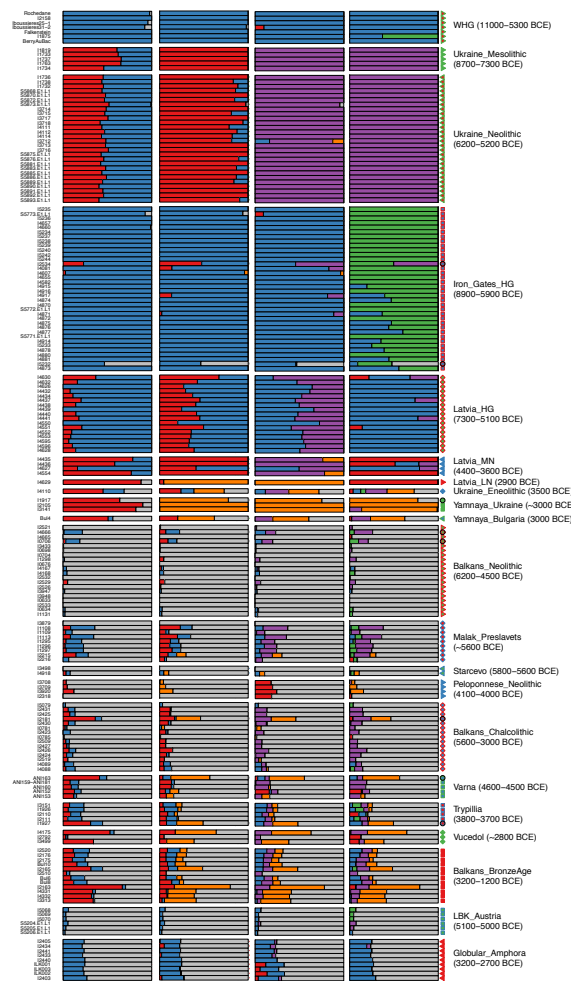

750

751 **Extended Data Figure 2:** Supervised admixture plot for K=3 to 6. We ran on 357 ancient  
752 individuals and show newly reported ancient individuals with some previously published  
753 ancient individuals for comparison. K=4 is shown in Figure 1D. Clusters constrained to  
754 include individuals from Anatolia\_Neolithic (grey), WHG (blue), EHG (red),  
755 Yamnaya\_Samara (orange), Ukraine\_Mesolithic (purple), Motala\_HG (green).

756



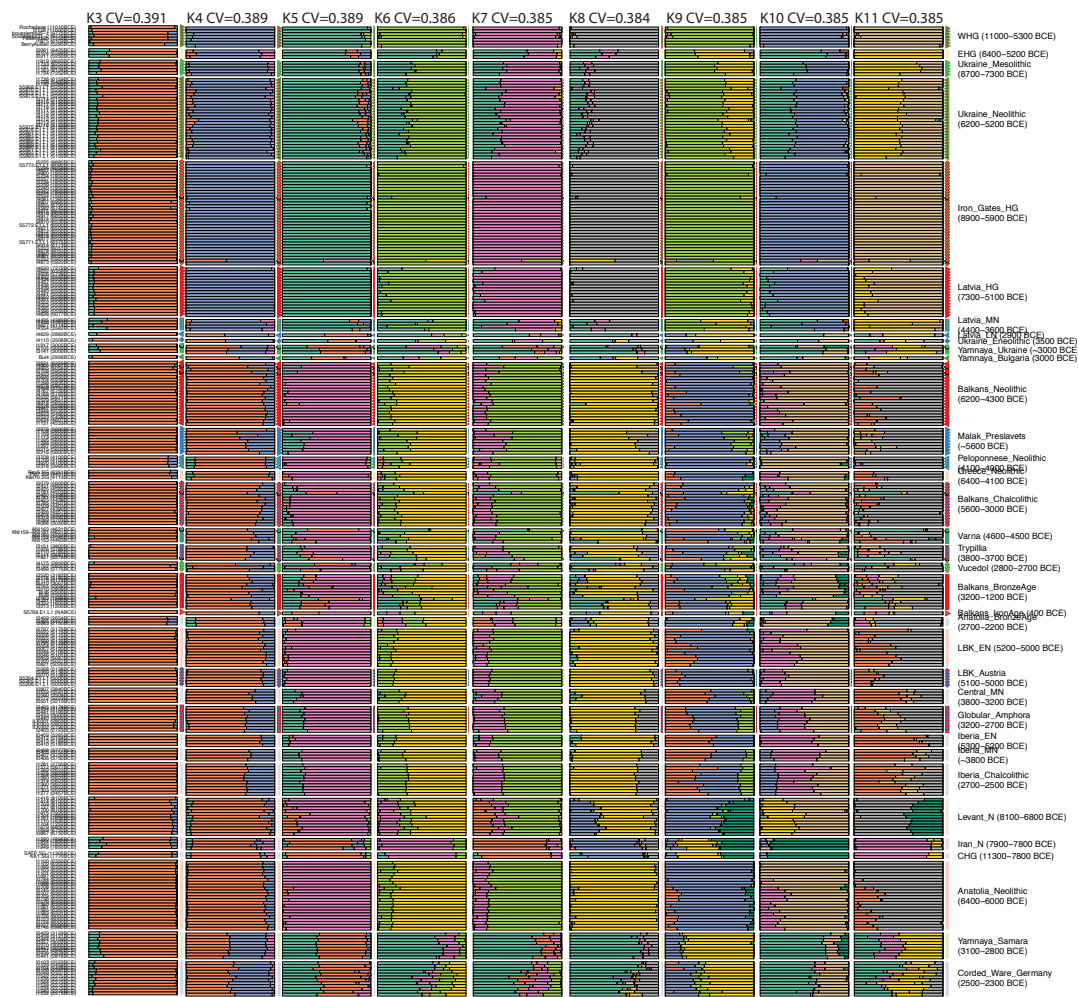

757

758 **Extended Data Figure 3:** Unsupervised ADMIXTURE plot from k=3 to 11, on a dataset  
759 consisting of 799 present-day individuals and 405 ancient individuals. We show newly  
760 reported ancient individuals and some previously published individuals for comparison.

761

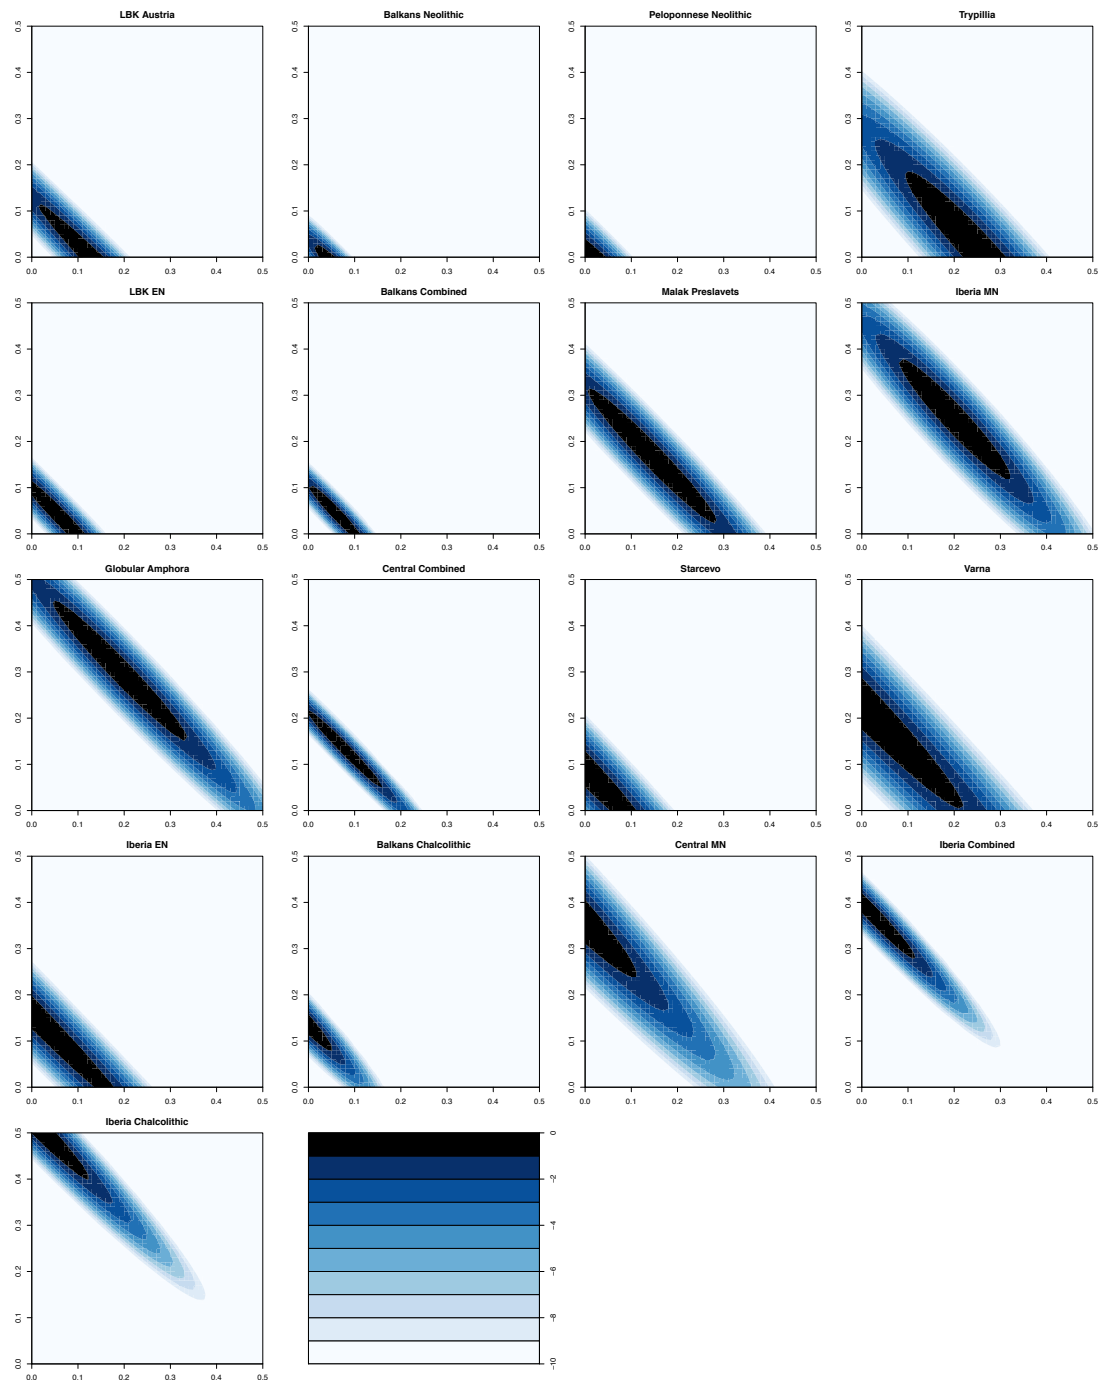

762

763 Extended Data Figure 4: log-likelihood surfaces for the proportion of female (x-axis) and  
764 male (y-axis) ancestors that are hunter-gatherers for the populations analysed in Figure 3.  
765 Log-likelihood scale ranges from 0 to -10, where 0 is the feasible point with the highest  
766 likelihood.

767

768

## 769 **Supplementary Tables**

- 770 **Supplementary Table 1:** Details of ancient individuals analyzed in this study.
- 771 **Supplementary Table 2:** Key *D*-statistics to support statements about population history.
- 772 **Supplementary Table 3:** *qpAdm* models with 7-population outgroup set.
- 773 **Supplementary Table 4:** *qpAdm* models with extended 14-population outgroup set.
- 774 **Supplementary Table 5:** *qpAdm* models for Neolithic populations for chromosome X.

## 775 **References**

- 776
- 777 1 Tringham, R. E. Southeastern Europe in the Transition to Agriculture in Europe:  
778 Bridge, Buffer or Mosaic. In: *The Transition to Agriculture in Prehistoric Europe* (ed  
779 D. Price) 19-56 (Cambridge University Press, 2000).
- 780 2 Bellwood, P. *First Farmers: The Origins of Agricultural Societies* (Wiley-Blackwell,  
781 2004).
- 782 3 Golitko, M. First farmers of Central Europe. In: *Ancient Europe, 8000 B.C. to A.D.*  
783 *1000: An Encyclopedia of the Barbarian World* (eds P. Bogucki & P.J. Crabtree)  
784 259-266 (Charles Scribners & Sons, 2003).
- 785 4 Vander Linden, M. To Tame a Land: Archaeological Cultures and the Spread of the  
786 Neolithic in Western Europe. In: *Investigating Archaeological Cultures: Material*  
787 *Culture, Variability, and Transmission* (eds B.W. Roberts & M. Vander Linden) 289-  
788 319 (Springer, 2012).
- 789 5 Bramanti, B. *et al.* Genetic discontinuity between local hunter-gatherers and central  
790 Europe's first farmers. *Science* **326**, 137-140 (2009).
- 791 6 Skoglund, P. *et al.* Origins and genetic legacy of Neolithic farmers and hunter-  
792 gatherers in Europe. *Science* **336**, 466-469 (2012).
- 793 7 Haak, W. *et al.* Massive migration from the steppe was a source for Indo-European  
794 languages in Europe. *Nature* **522**, 207-211 (2015).
- 795 8 Cassidy, L. M. *et al.* Neolithic and Bronze Age migration to Ireland and  
796 establishment of the insular Atlantic genome. *Proceedings of the National Academy*  
797 *of Sciences of the United States of America* **113**, 368-373 (2016).
- 798 9 Hofmanova, Z. *et al.* Early farmers from across Europe directly descended from  
799 Neolithic Aegeans. *Proceedings of the National Academy of Sciences of the United*  
800 *States of America* **113**, 6886-6891 (2016).
- 801 10 Mathieson, I. *et al.* Genome-wide patterns of selection in 230 ancient Eurasians.  
802 *Nature* **528**, 499-503 (2015).
- 803 11 Omrak, A. *et al.* Genomic Evidence Establishes Anatolia as the Source of the  
804 European Neolithic Gene Pool. *Current Biology* **26**, 270-275 (2016).
- 805 12 Müller, J., Rassmann, K. & Videiko, M. *Trypillia Mega-Sites and European*  
806 *Prehistory: 4100–3400 BCE*. (Routledge, 2016).
- 807 13 Fu, Q. *et al.* An early modern human from Romania with a recent Neanderthal  
808 ancestor. *Nature* (2015).
- 809 14 Alexander, D. H., Novembre, J. & Lange, K. Fast model-based estimation of ancestry  
810 in unrelated individuals. *Genome Research* **19**, 1655-1664 (2009).
- 811 15 Patterson, N. *et al.* Ancient admixture in human history. *Genetics* **192**, 1065-1093  
812 (2012).
- 813 16 Allentoft, M. E. *et al.* Population genomics of Bronze Age Eurasia. *Nature* **522**, 167-  
814 172 (2015).
- 815 17 Fu, Q. *et al.* Genome sequence of a 45,000-year-old modern human from western  
816 Siberia. *Nature* **514**, 445-449 (2014).

- 817 18 Fu, Q. *et al.* The genetic history of Ice Age Europe. *Nature* **534**, 200-205 (2016).
- 818 19 Gallego Llorente, M. *et al.* Ancient Ethiopian genome reveals extensive Eurasian  
819 admixture in Eastern Africa. *Science* **350**, 820-822 (2015).
- 820 20 Jones, E. R. *et al.* Upper Palaeolithic genomes reveal deep roots of modern Eurasians.  
821 *Nat Commun* **6**, 8912 (2015).
- 822 21 Keller, A. *et al.* New insights into the Tyrolean Iceman's origin and phenotype as  
823 inferred by whole-genome sequencing. *Nat Commun* **3**, 698 (2012).
- 824 22 Kilinc, G. M. *et al.* The Demographic Development of the First Farmers in Anatolia.  
825 *Current Biology* (2016).
- 826 23 Lazaridis, I. *et al.* Genomic insights into the origin of farming in the ancient Near  
827 East. *Nature* **536**, 419-424 (2016).
- 828 24 Lazaridis, I. *et al.* Ancient human genomes suggest three ancestral populations for  
829 present-day Europeans. *Nature* **513**, 409-413 (2014).
- 830 25 Olalde, I. *et al.* Derived immune and ancestral pigmentation alleles in a 7,000-year-  
831 old Mesolithic European. *Nature* **507**, 225-228 (2014).
- 832 26 Raghavan, M. *et al.* Upper Palaeolithic Siberian genome reveals dual ancestry of  
833 Native Americans. *Nature* **505**, 87-91 (2014).
- 834 27 Lazaridis, I. *et al.* Manuscript in revision. (2017).
- 835 28 Lipson, M. *et al.* Parallel ancient genomic transects reveal complex population  
836 history of early European farmers. *bioRxiv*, <https://doi.org/10.1101/114488> (2017).
- 837 29 Mallick, S. *et al.* The Simons Genome Diversity Project: 300 genomes from 142  
838 diverse populations. *Nature* (2016).
- 839 30 Gronenborn, D. & Dolukhanov, P. Early Neolithic Manifestations in Central and  
840 Eastern Europe. In: *The Oxford Handbook of Neolithic Europe* (eds C. Fowler, J.  
841 Harding, & D. Hofmann) (Oxford University Press, 2015).
- 842 31 Telegin, D. Y. Neolithic cultures of Ukraine and their chronology. *Journal of World*  
843 *Prehistory* **I**, 307-331 (1987).
- 844 32 Telegin, D. Y. & Potekhina, I. D. *Neolithic cemeteries and populations in the*  
845 *Dnieper Basin*. . BAR International Series 383 (British Archaeological Reports,  
846 1987).
- 847 33 Petkova, D., Novembre, J. & Stephens, M. Visualizing spatial population structure  
848 with estimated effective migration surfaces. *Nature Genetics* **48**, 94-100 (2016).
- 849 34 Jones, E. R. *et al.* The Neolithic Transition in the Baltic Was Not Driven by  
850 Admixture with Early European Farmers. *Current Biology* (2017).
- 851 35 Broushaki, F. *et al.* Early Neolithic genomes from the eastern Fertile Crescent.  
852 *Science* **353**, 499-503 (2016).
- 853 36 Mittnik, A. *et al.* The Genetic History of Northern Europe. *bioRxiv*,  
854 <https://doi.org/10.1101/113241> (2017).
- 855 37 Saag, L. *et al.* Extensive farming in Estonia started through a sex-biased migration  
856 from the Steppe. *bioRxiv* (2017).
- 857 38 Maier, A. *The Central European Magdalenian: Regional Diversity and Internal*  
858 *Variability*. (Springer, 2015).
- 859 39 Borić, D. & Price, T. D. Strontium isotopes document greater human mobility at the  
860 start of the Balkan Neolithic. *PNAS* **110**, 3298-3303 (2013).
- 861 40 Bacvarov, K. Malak Preslavets Revisited: The Early Neolithic Burials. In: *Moments*  
862 *in time: Papers Presented to Pál Raczkó on His 60th Birthday* (eds A. Anders & G  
863 Kulcsár) 29-34 (L'Harmattan, 2013).
- 864 41 Gurova, M. & Bonsall, C. 'Pre-Neolithic' in Southeast Europe: a Bulgarian  
865 perspective. *Documenta Praehistorica* **XLI**, 95-109 (2014).
- 866 42 Borić, D. Mortuary practices, bodies and persons in the Neolithic and Early-Middle  
867 Copper Age of southeast Europe. In: *The Oxford Handbook of Neolithic Europe* (eds  
868 C. Fowler, J. Harding, & D. Hofmann) 927-957 (Oxford University Press, 2015).
- 869 43 Brandt, G. *et al.* Ancient DNA reveals key stages in the formation of central  
870 European mitochondrial genetic diversity. *Science* **342**, 257-261 (2013).

- 871 44 Olalde, I. *et al.* A Common Genetic Origin for Early Farmers from Mediterranean  
872 Cardial and Central European LBK Cultures. *Molecular Biology and Evolution* **32**,  
873 3132-3142 (2015).
- 874 45 Krauß, R., Marinova, E., De Brue, H. & Wenginger, B. The rapid spread of early  
875 farming from the Aegean into the Balkans via the Sub-Mediterranean-Aegean  
876 Vegetation Zone. *Quaternary International* **XXX**, 1-18 (2017).
- 877 46 Perlès, C. *The early Neolithic in Greece* (Cambridge University Press, 2001).
- 878 47 Posth, C. *et al.* Pleistocene Mitochondrial Genomes Suggest a Single Major Dispersal  
879 of Non-Africans and a Late Glacial Population Turnover in Europe. *Current Biology*  
880 **26**, 827-833 (2016).
- 881 48 Skoglund, P. *et al.* Genomic diversity and admixture differs for Stone-Age  
882 Scandinavian foragers and farmers. *Science* **344**, 747-750 (2014).
- 883 49 Rowley-Conwy, P. Westward Ho! The Spread of Agriculturalism from Central  
884 Europe to the Atlantic. *Current Anthropology* **52**, S431-S451 (2011).
- 885 50 Bollongino, R. *et al.* 2000 years of parallel societies in Stone Age Central Europe.  
886 *Science* **342**, 479-481 (2013).
- 887 51 Anthony, D. W. & Ringe, D. The Indo-European Homeland from Linguistic and  
888 Archaeological Perspectives. *Annual Review of Linguistics* **1**, 199-219 (2015).
- 889 52 Anthony, D. W. *The horse the wheel and language* (Princeton University Press,  
890 2007).
- 891 53 Goldberg, A., Gunther, T., Rosenberg, N. A. & Jakobsson, M. Ancient X  
892 chromosomes reveal contrasting sex bias in Neolithic and Bronze Age Eurasian  
893 migrations. *Proceedings of the National Academy of Sciences of the United States of*  
894 *America* **114**, 2657-2662 (2017).
- 895 54 Dabney, J. *et al.* Complete mitochondrial genome sequence of a Middle Pleistocene  
896 cave bear reconstructed from ultrashort DNA fragments. *Proceedings of the National*  
897 *Academy of Sciences of the United States of America* **110**, 15758-15763 (2013).
- 898 55 Meyer, M. & Kircher, M. Illumina sequencing library preparation for highly  
899 multiplexed target capture and sequencing. *Cold Spring Harb Protoc* **2010**, pdb  
900 prot5448 (2010).
- 901 56 Rohland, N., Harney, E., Mallick, S., Nordenfelt, S. & Reich, D. Partial uracil-DNA-  
902 glycosylase treatment for screening of ancient DNA. *Philosophical Transactions of*  
903 *the Royal Society of London. Series B: Biological Sciences* **370**, 20130624 (2015).
- 904 57 Korlevic, P. *et al.* Reducing microbial and human contamination in DNA extractions  
905 from ancient bones and teeth. *BioTechniques* **59**, 87-93 (2015).
- 906 58 Briggs, A. W. *et al.* Removal of deaminated cytosines and detection of in vivo  
907 methylation in ancient DNA. *Nucleic Acids Research* **38**, e87 (2010).
- 908 59 DeAngelis, M. M., Wang, D. G. & Hawkins, T. L. Solid-phase reversible  
909 immobilization for the isolation of PCR products. *Nucleic Acids Research* **23**, 4742-  
910 4743 (1995).
- 911 60 Rohland, N. & Reich, D. Cost-effective, high-throughput DNA sequencing libraries  
912 for multiplexed target capture. *Genome Research* **22**, 939-946 (2012).
- 913 61 Maricic, T., Whitten, M. & Paabo, S. Multiplexed DNA sequence capture of  
914 mitochondrial genomes using PCR products. *PloS One* **5**, e14004 (2010).
- 915 62 Kircher, M., Sawyer, S. & Meyer, M. Double indexing overcomes inaccuracies in  
916 multiplex sequencing on the Illumina platform. *Nucleic Acids Research* **40**, e3  
917 (2012).
- 918 63 Fu, Q. *et al.* A revised timescale for human evolution based on ancient mitochondrial  
919 genomes. *Current Biology* **23**, 553-559 (2013).
- 920 64 Skoglund, P. *et al.* Separating endogenous ancient DNA from modern day  
921 contamination in a Siberian Neandertal. *Proceedings of the National Academy of*  
922 *Sciences of the United States of America* **111**, 2229-2234 (2014).
- 923 65 Korneliusson, T. S., Albrechtsen, A. & Nielsen, R. ANGSD: Analysis of Next  
924 Generation Sequencing Data. *BMC Bioinformatics* **15**, 356 (2014).

- 925 66 Price, A. L. *et al.* Principal components analysis corrects for stratification in genome-  
926 wide association studies. *Nature Genetics* **38**, 904-909 (2006).
- 927 67 Brown, L., Cai, T. & DasGupta, A. Interval Estimation for a Binomial Proportion.  
928 *Statistical Science* **16**, 101-133 (2001).
- 929 68 Agresti, A. & Coull, B. Approximate is better than "exact" for interval estimation of  
930 binomial proportions. *The American Statistician* **52**, 119-126 (1998).
- 931 69 Longin, R. New method of collagen extraction for radiocarbon analysis. *Nature* **230**,  
932 241-242 (1971).
- 933 70 Brown, T. A., Nelson, D. E., Vogel, J. S. & Southon, J. R. Improved collagen  
934 extraction by modified longin method. *Radiocarbon* **30**, 171-177 (1988).
- 935 71 van Klinken, G. J. Bone collagen quality indicators for paleodietary and radiocarbon  
936 measurements. *Journal of Archaeological Science* **26**, 687-695 (1999).
- 937 72 Stuiver, M. & Polach, H. A. Discussion: Reporting of <sup>14</sup>C data. *Radiocarbon* **19**,  
938 355-363 (1977).
- 939 73 Bronk Ramsey, C. *OxCal 4.23 Online Manual*,  
940 <[https://c14.arch.ox.ac.uk/oxcalhelp/hlp\\_contents.html](https://c14.arch.ox.ac.uk/oxcalhelp/hlp_contents.html)> (2013).  
941
